# Supplementary material for: MiR-320a acts as a prognostic factor and Inhibits metastasis of salivary adenoid cystic carcinoma by targeting ITGB3
Source: PubMed Central journal article supplement (PMC4423101; doi:10.1186/s12943-015-0344-y), 2015-04-29

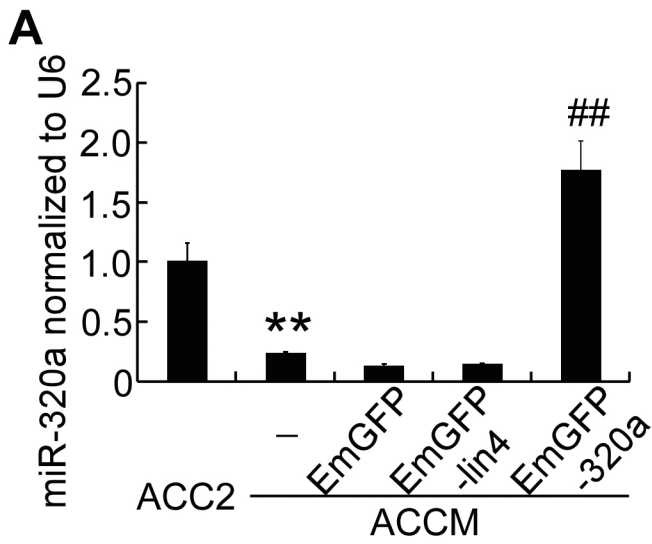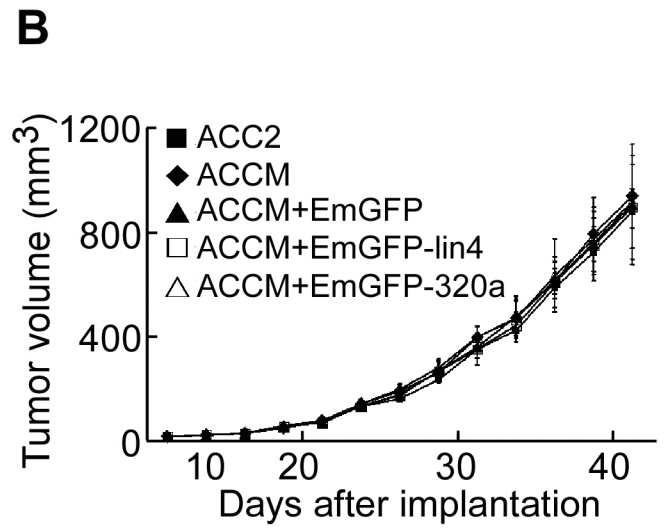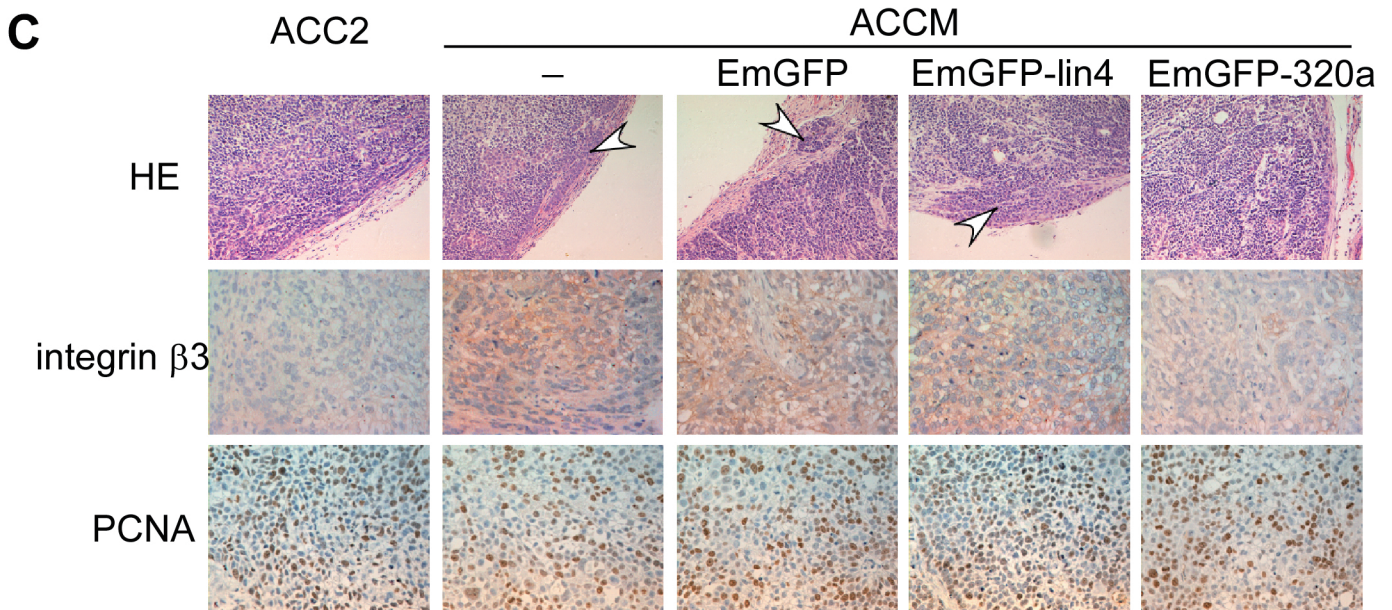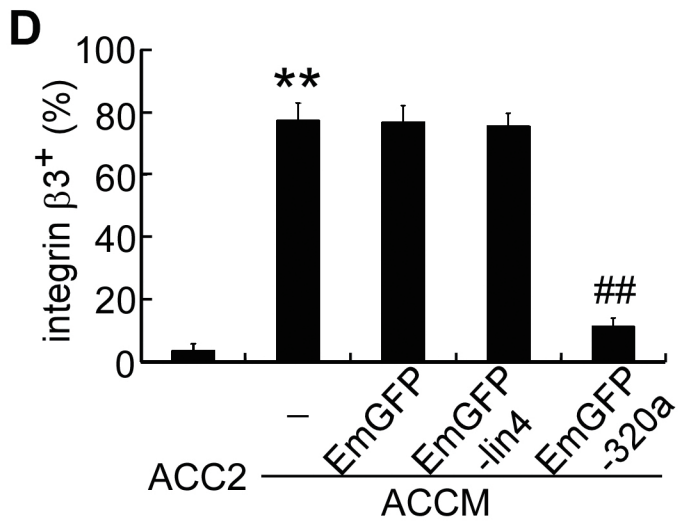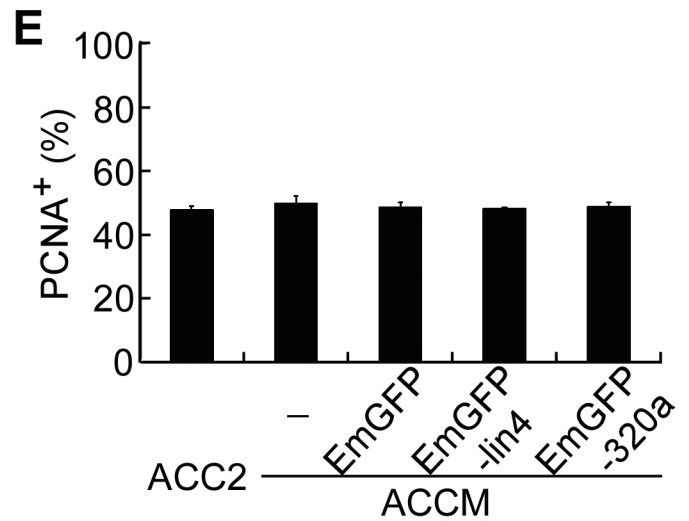

Supplement: 12943_2015_344_MOESM4_ESM.pdf [file 12943_2015_344_MOESM4_ESM.pdf]
