# Supplementary material for: MiR-320a acts as a prognostic factor and Inhibits metastasis of salivary adenoid cystic carcinoma by targeting ITGB3
Source: PubMed Central journal article supplement (PMC4423101; doi:10.1186/s12943-015-0344-y), 2015-04-29
Supplement: 12943_2015_344_MOESM7_ESM.pdf [file 12943_2015_344_MOESM7_ESM.pdf]

**Additional file 7. Multivariate analysis of various variables for lung metastasis in SACC patients using Cox regression analysis**

| Variables                                              | Sun Yat-sen University (N=302) |               |           | Central South University (N=148) |               |          |
|--------------------------------------------------------|--------------------------------|---------------|-----------|----------------------------------|---------------|----------|
|                                                        | HR                             | (95% CI)      | <i>P</i>  | HR                               | (95% CI)      | <i>P</i> |
| Gender (female vs. male)                               | 1.249                          | (0.877-1.778) | 0.217     | 0.925                            | (0.568-1.508) | 0.756    |
| Age ( $\geq 50$ vs. $< 50$ )                           | 0.780                          | (0.551-1.104) | 0.161     | 1.004                            | (0.604-1.668) | 0.989    |
| Tumor diameter ( $\geq 4$ cm vs. $< 4$ cm)             | 1.177                          | (0.500-2.768) | 0.709     | 1.151                            | (0.376-3.524) | 0.805    |
| Lymph node status (N <sub>1</sub> vs. N <sub>0</sub> ) | 1.595                          | (0.987-2.576) | 0.056     | 2.077                            | (1.056-4.086) | 0.034    |
| TNM stage (III-IV vs. I-II)                            | 1.400                          | (0.943-2.079) | 0.095     | 1.630                            | (0.925-2.870) | 0.091    |
| Integrin $\beta 3$ expression (high vs. low)           | 1.325                          | (0.861-2.039) | 0.200     | 1.334                            | (0.712-2.499) | 0.369    |
| MiR-320a expression (high vs. low)                     | 0.450                          | (0.300-0.675) | $< 0.001$ | 0.363                            | (0.200-0.659) | 0.001    |
