# Supplementary material for: MiR-320a acts as a prognostic factor and Inhibits metastasis of salivary adenoid cystic carcinoma by targeting ITGB3
Source: Springer Nature journal article supplement (doi:10.1186/s12943-015-0344-y), 2015-04-28
Supplement: MOESM1 [file 9763034]

**Additional file 1. MicroRNA microarray analysis comparing ACC2 and ACCM cells**

| <b>microRNA Name</b> | <b>Ratio (ACCM: ACC2)</b> |
|----------------------|---------------------------|
| hsa-let-7g           | 2.41                      |
| hsa-miR-24           | 2.03                      |
| hsa-miR-195          | 4.83                      |
| hsa-miR-342-3p       | 2.07                      |
| hsa-miR-939          | 2.63                      |
| hsa-let-7b           | 0.49                      |
| hsa-miR-23b          | 0.48                      |
| hsa-miR-93           | 0.44                      |
| hsa-miR-98           | 0.45                      |
| hsa-miR-320a         | 0.50                      |
| hsa-miR-674          | 0.40                      |
| hsa-miR-886-5p       | 0.48                      |
