# Supplementary material for: MiR-320a acts as a prognostic factor and Inhibits metastasis of salivary adenoid cystic carcinoma by targeting ITGB3
Source: Springer Nature journal article supplement (doi:10.1186/s12943-015-0344-y), 2015-04-28

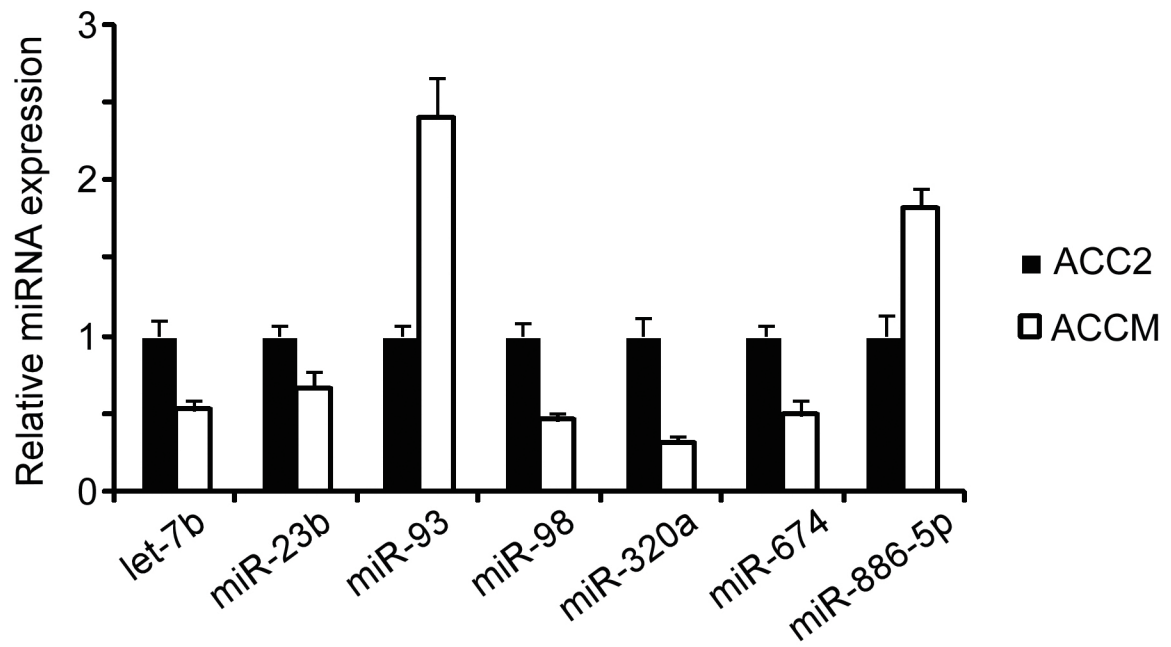

Supplement: MOESM2 [file 9763034]
